# Supplementary material
Source: ML conference proceedings conference paper supplement (https://openreview.net/forum?id=WrEFIbrVg9)
Supplement: supplementary_material [file attachment]

# SUPPLEMENTARY TO "NON-ASYMPTOTIC ANALYSIS OF STOCHASTIC GRADIENT DESCENT UNDER LOCAL DIFFERENTIAL PRIVACY GUARANTEE"

**Anonymous authors**

Paper under double-blind review

## A APPENDIX

The appendix contains all technical proofs and some additional experiment results.

### A.1 PROOF OF LEMMAS AND THEOREMS

*Proof of Theorem 1.* Consider two different data points  $x$  and  $x'$ , at the first iteration, notice that

$$\|\eta_1 \nabla f(\theta_0, x) - \eta_1 \nabla f(\theta_0, x')\|_2 \leq 2\eta_1 C_0.$$

Therefore, the sensitivity of the gradient iterates  $\theta_1$  is bounded by  $2\eta_1 C_0$ . Using Proposition 1, adding a Gaussian noise  $2\eta_1 C_0 / \mu_1 \omega_1$  to a gradient update makes this step  $\mu_1$ -GDP. Consequently,  $\theta_1$  is  $\mu_1$ -GDP since the initial estimate  $\theta_0$  is deterministic. The second iterate  $\theta_2$  takes  $\theta_1$  as input in addition to the dataset. According to the Proposition 2, we then have the two-fold joint mechanism  $(\theta_1, \theta_2)$  is  $\max\{\mu_1, \mu_2\}$ -GDP. Using the same argument repeatedly, we have completed the proof of this theorem. □

*Proof of Theorem 2.* Following the proof of Theorem 1, the statement in Theorem 2 is also true. □

*Proof of Theorem 3.* Recall that

$$\theta_n = \theta_{n-1} - \eta_n \nabla f(\theta_{n-1}, x_n) + \eta_n A_n,$$

where  $A_n = 2C_0 \omega_n / \mu_n$ . We then have

$$\begin{aligned} \|\theta_n - \theta^*\|^2 &= \|\theta_{n-1} - \theta^*\|^2 - 2\eta_n \langle \theta_{n-1} - \theta^*, \nabla f(\theta_{n-1}, x_n) \rangle + \eta_n^2 \|\nabla f(\theta_{n-1}, x_n)\|^2 + \eta_n^2 \|A_n\|^2 \\ &\quad + 2\eta_n \langle \theta_{n-1} - \theta^*, A_n \rangle - 2\eta_n^2 \langle \nabla f(\theta_{n-1}, x_n), A_n \rangle. \end{aligned} \quad (1)$$

Notice that  $E(A_n) = 0$  and therefore the expectations of the last two terms of (1) are zero. Under Condition 1, we have  $E(\|\nabla f(\theta_{i-1}, x_i)\|^2) \leq C_0^2$ . For the second term of (1), by Condition ??, we have

$$\begin{aligned} E(\langle \theta_{n-1} - \theta^*, \nabla f(\theta_{n-1}, x_n) \rangle) &= E(\langle \theta_{n-1} - \theta^*, \nabla f(\theta_{n-1}, x_n) - \nabla f(\theta^*, x_n) \rangle) \\ &\geq m E(\|\theta_{n-1} - \theta^*\|^2), \end{aligned}$$

where the first equality holds due to  $E\{\nabla f(\theta^*, x_n)\} = 0$ . For the fourth term of (1), we know

$$E(\|A_n\|^2) = \frac{4C_0^2}{\mu_n^2} E(\|\omega_n\|^2) = \frac{64C_0^2 d}{\mu_n^2} := \tau_n^2.$$

Define  $\Delta_n = E(\|\theta_n - \theta^*\|^2)$ . Combining the above inequalities, we then have the following recursion rule

$$\Delta_n \leq \Delta_{n-1} - 2m\eta_n \Delta_{n-1} + \eta_n^2 C_0^2 + \gamma_n^2 \tau_n^2 \leq (1 - 2m\eta_n) \Delta_{n-1} + \eta_n^2 (C_0^2 + \tau_n^2). \quad (2)$$

Notice that  $(1 - 2m\eta_n)\Delta_{n-1}$  is always positive with  $\eta_n = \eta n^{-\alpha}$  when  $2m\eta < 1$ . Applying the recursion (2)  $n$  times, we obtain

$$\begin{aligned}\Delta_n &\leq \prod_{k=1}^n (1 - 2m\eta_k) \Delta_0 + \sum_{k=1}^n \prod_{i=k+1}^n (1 - 2m\eta_i) \{\eta_k^2 (C_0^2 + \tau_k^2)\} \\ &\leq A_{1,n} \Delta_0 + A_{2,n} \tilde{\sigma}_\mu^2,\end{aligned}$$

where  $\tilde{\sigma}_\mu^2 = \max_k \{C_0^2 + \tau_k^2\}$ . For  $A_{1,n}$ , using the fact  $e^{-x} \geq 1 - x$ , we have

$$A_{1,n} \leq \exp \left( -2m \sum_{k=1}^n \eta_k \right).$$

For  $A_{2,n}$ , we decompose it as follows

$$\begin{aligned}A_{2,n} &= \sum_{k=1}^{n/2} \prod_{i=k+1}^n (1 - 2m\eta_i) \eta_k^2 + \sum_{k=n/2+1}^n \prod_{i=k+1}^n (1 - 2m\eta_i) \eta_k^2 \\ &\leq \prod_{i=n/2+1}^n (1 - 2m\eta_i) \sum_{k=1}^{n/2} \eta_k^2 + \eta_{n/2} \sum_{k=n/2+1}^n \prod_{i=k+1}^n (1 - 2m\eta_i) \eta_k \\ &\leq \exp \left( -2m \sum_{i=n/2+1}^n \eta_i \right) \sum_{k=1}^{n/2} \eta_k^2 + \frac{\eta_{n/2}}{2m} \sum_{k=n/2+1}^n \left[ \prod_{i=k+1}^n (1 - 2m\eta_i) - \prod_{i=k}^n (1 - 2m\eta_i) \right] \\ &\leq \exp \left( -2m \sum_{i=n/2+1}^n \eta_i \right) \sum_{k=1}^{n/2} \eta_k^2 + \frac{\eta_{n/2}}{2m} \left[ 1 - \prod_{i=n/2+1}^n (1 - 2m\eta_i) \right] \\ &\leq \exp \left( -2m \sum_{i=n/2+1}^n \eta_i \right) \sum_{k=1}^n \eta_k^2 + \frac{\eta_{n/2}}{2m}.\end{aligned}$$

When  $\eta_n = \eta n^{-\alpha}$ , we have the two following two inequalities

$$\frac{\eta}{2} \psi_{1-\alpha}(n) \leq \sum_{i=1}^n \eta_i \leq \eta \psi_{1-\alpha}(n), \quad \frac{\eta^2}{2} \psi_{1-2\alpha}(n) \leq \sum_{i=1}^n \eta_i^2 \leq \eta^2 \psi_{1-2\alpha}(n),$$

where  $\psi_\beta(n) = (n^\beta - 1)/\beta$ . Then, we have

$$\begin{aligned}A_{1,n} &\leq \exp\{-2m\eta\psi_{1-\alpha}(n)\}, \\ A_{2,n} &\leq \eta^2 \psi_{1-2\alpha}(n) \exp\{-m\eta(\psi_{1-\alpha}(n) - \psi_{1-\alpha}(n/2))\} + \frac{\eta}{mn^\alpha}.\end{aligned}$$

Note that  $\psi_{1-\alpha}(n) - \psi_{1-\alpha}(n/2) \geq n^{1-\alpha}/2$ . Therefore, using the above inequalities, we have

$$\begin{aligned}\Delta_n &\leq \exp\{-2m\eta\psi_{1-\alpha}(n)\} \Delta_0 + \frac{\eta\sigma_M^2}{mn^\alpha} + \eta^2 \sigma_M^2 \psi_{1-2\alpha}(n) \exp(-m\eta n^{1-\alpha}/2) \\ &\leq \exp\{-2m\eta\psi_{1-\alpha}(n)\} \Delta_0 + C_0^2 \left( \frac{\eta}{mn^\alpha} + \eta^2 \psi_{1-2\alpha}(n) \exp(-m\eta n^{1-\alpha}/2) \right) \left( 1 + \frac{64d}{\min_k \{\mu_k^2\}} \right).\end{aligned}$$

□

*Proof of Theorem 4.* Notice that

$$\begin{aligned}&E\{\nabla^2 f(\theta^*, x_n)\} (\theta_{n-1} - \theta^*) \\ &= \nabla^2 f(\theta^*, x_n) (\theta_{n-1} - \theta^*) + [E\{\nabla^2 f(\theta^*, x_n)\} - \nabla^2 f(\theta^*, x_n)] (\theta_{n-1} - \theta^*) \\ &= \nabla f(\theta_{n-1}, x_n) - \nabla f(\theta^*, x_n) + [\nabla^2 f(\theta^*, x_n) (\theta_{n-1} - \theta^*) - \nabla f(\theta_{n-1}, x_n) + \nabla f(\theta^*, x_n)] \\ &\quad + [E\{\nabla^2 f(\theta^*, x_n)\} - \nabla^2 f(\theta^*, x_n)] (\theta_{n-1} - \theta^*) \\ &= I_1 + I_2 + I_3 + I_4.\end{aligned}\tag{3}$$

For  $I_1$ , we have

$$\nabla f(\theta_{n-1}, x_n) = \frac{1}{\eta_n} (\theta_{n-1} - \theta_n) + A_n.$$

Then, we get

$$\begin{aligned} \frac{1}{n} \sum_{k=1}^n \nabla f(\theta_{k-1}, x_k) &= \frac{1}{n} \sum_{k=1}^n \frac{1}{\eta_k} (\theta_{k-1} - \theta_k) + \frac{1}{n} \sum_{k=1}^n A_k \\ &= \frac{1}{n} \sum_{k=1}^{n-1} (\theta_k - \theta^*) \cdot \left( \frac{1}{\eta_{k+1}} - \frac{1}{\eta_k} \right) - \frac{1}{n} (\theta_n - \theta^*) \cdot \frac{1}{\eta_n} + \frac{1}{n} (\theta_0 - \theta^*) \cdot \frac{1}{\eta_1} + \frac{1}{n} \sum_{k=1}^n A_k. \end{aligned}$$

For  $I_2$ , we have

$$E \left\| E \{ \nabla^2 f(\theta^*, x_n) \}^{-1} \frac{1}{n} \sum_{k=1}^n \nabla f(\theta^*, x_k) \right\|^2 \leq \frac{1}{n} \text{tr} [E \{ \nabla^2 f(\theta^*, x_k) \}^{-1} S E \{ \nabla^2 f(\theta^*, x_k) \}^{-1}],$$

where  $S = \mathbb{E} \{ \nabla f(\theta^*, x) \nabla f(\theta^*, x)^\top \}$ . For  $I_3$ , using Condition 3, we obtain

$$\| \nabla^2 f(\theta^*, x_n) (\theta_{n-1} - \theta^*) - \nabla f(\theta_{n-1}, x_n) + \nabla f(\theta^*, x_n) \| \leq \frac{C_1}{2} \|\theta_{n-1} - \theta^*\|^2.$$

Therefore,

$$E \left\| \frac{1}{n} \sum_{k=1}^n \{ \nabla^2 f(\theta^*, x_k) (\theta_{k-1} - \theta^*) - \nabla f(\theta_{k-1}, x_k) + \nabla f(\theta^*, x_k) \} \right\|^2 \leq \frac{C_1^2}{4n^2} \sum_{k=0}^{n-1} \|\theta_k - \theta^*\|^4.$$

For  $I_4$ , under Condition 2, we get

$$E(\| [E \{ \nabla^2 f(\theta^*, x_n) \} - \nabla^2 f(\theta^*, x_n)] (\theta_{n-1} - \theta^*) \|^2) \leq 4M^2 \|\theta_{n-1} - \theta^*\|^2.$$

We then have

$$E \left\| \frac{1}{n} \sum_{k=1}^n [E \{ \nabla^2 f(\theta^*, x_k) \} - \nabla^2 f(\theta^*, x_k)] (\theta_{k-1} - \theta^*) \right\|^2 \leq \frac{4M^2}{n^2} \sum_{k=0}^{n-1} \|\theta_k - \theta^*\|^2.$$

Next, we need to bound  $\|\theta_n - \theta^*\|^2$  and  $\|\theta_n - \theta^*\|^4$ . From the proof of Theorem 3, we know the following recursion formula

$$\begin{aligned} \|\theta_n - \theta^*\|^2 &= \|\theta_{n-1} - \theta^*\|^2 - 2\eta_n \langle \theta_{n-1} - \theta^*, \nabla f(\theta_{n-1}, x_n) \rangle + \eta_n^2 \|\nabla f(\theta_{n-1}, x_n)\|^2 + \eta_n^2 \|A_n\|^2 \\ &\quad + 2\eta_n \langle \theta_{n-1} - \theta^*, A_n \rangle - 2\eta_n^2 \langle \nabla f(\theta_{n-1}, x_n), A_n \rangle. \end{aligned}$$

For notation simplicity, denote  $\delta_n = \theta_n - \theta^*$  and  $\Psi_n = \nabla f(\theta_n, x_{n+1})$ . Then, we have the fourth order as follows

$$\begin{aligned} \|\delta_n\|^4 &= \|\delta_{n-1}\|^4 - 4\eta_n \langle \delta_{n-1}, \Psi_n \rangle \|\delta_{n-1}\|^2 + 4\eta_n \langle \delta_{n-1}, A_n \rangle \|\delta_{n-1}\|^2 - 4\eta_n^2 \langle \Psi_{n-1}, A_n \rangle \|\delta_{n-1}\|^2 \\ &\quad + 2\eta_n^2 \|\Psi_{n-1}\|^2 \|\delta_{n-1}\|^2 + 2\eta_n^2 \|A_n\|^2 \|\delta_{n-1}\|^2 - 4\eta_n^2 \langle \Psi_{n-1}, A_n \rangle \|\delta_{n-1}\|^2 \\ &\quad + 4\eta_n^3 \langle \delta_{n-1}, \Psi_{n-1} \rangle \langle \Psi_{n-1}, A_n \rangle - 4\eta_n^3 \|\Psi_{n-1}\|^2 \langle \delta_{n-1}, \Psi_{n-1} \rangle - 4\eta_n^3 \|A_n\|^2 \langle \delta_{n-1}, \Psi_{n-1} \rangle \\ &\quad - 8\eta_n^3 \langle \delta_{n-1}, A_n \rangle \|A_n\|^2 + 4\eta_n^3 \langle \delta_{n-1}, A_n \rangle \|\Psi_{n-1}\|^2 \\ &\quad + 4\eta_n^3 \langle \delta_{n-1}, A_n \rangle \|A_n\|^2 - 4\eta_n^3 \langle \Psi_{n-1}, A_n \rangle \|\Psi_{n-1}\|^2 - 4\eta_n^3 \langle \Psi_{n-1}, A_n \rangle \|A_n\|^2 \\ &\quad + 2\eta_n^4 \|\Psi_{n-1}\|^2 \|A_n\|^2 + 4\eta_n^2 \|\Psi_{n-1}\|^2 \|\delta_{n-1}\|^2 + 4\eta_n^2 \|A_n\|^2 \|\delta_{n-1}\|^2 + 4\eta_n^4 \|A_n\|^2 \|\Psi_{n-1}\|^2 \\ &\quad + \eta_n^4 \|\Psi_{n-1}\|^4 + \eta_n^4 \|A_n\|^4. \end{aligned}$$

Note that all terms containing the first moment of  $A_n$  have zero expectations, then we only need to bound the following terms

$$\begin{aligned} -4\eta_n \langle \delta_{n-1}, \Psi_n \rangle \|\delta_{n-1}\|^2 &\leq -4m\eta_n \|\delta_{n-1}\|^4, \\ 6\eta_n^2 \|\Psi_{n-1}\|^2 \|\delta_{n-1}\|^2 &\leq m\eta_n \|\delta_{n-1}\|^4 + 9\eta_n^3 \|\Psi_{n-1}\|^4/m, \\ 2\eta_n^2 \|A_n\|^2 \|\delta_{n-1}\|^2 &\leq m\eta_n \|\delta_{n-1}\|^4/3 + 3\eta_n^3 \|A_n\|^4/m, \\ -4\eta_n^3 \|\Psi_{n-1}\|^2 \langle \delta_{n-1}, \Psi_{n-1} \rangle &\leq \eta_n^3 \|\delta_{n-1}\|^4 + 3\eta_n^3 \|\Psi_{n-1}\|^4, \\ -4\eta_n^3 \|A_n\|^2 \langle \delta_{n-1}, \Psi_{n-1} \rangle &\leq \eta_n^3 \|\delta_{n-1}\|^4 + 3\eta_n^3 \|A_n\|^4, \\ 6\eta_n^4 \|\Psi_{n-1}\|^2 \|A_n\|^2 &\leq 3\eta_n^4 \|\Psi_{n-1}\|^4 + 3\eta_n^4 \|A_n\|^4, \\ 4\eta_n^2 \|A_n\|^2 \|\delta_{n-1}\|^2 &\leq 2m\eta_n \|\delta_{n-1}\|^4/3 + 6\eta_n^3 \|A_n\|^4/m. \end{aligned}$$

According to the Lemma 1.19 of Rigollet & Hütter (2015) and Condition 1, we know  $E(\|A_n\|^4) \leq \tau_n^4$  and  $E(\|\Psi_{n-1}\|^4) \leq C_0^4$ . Combining the above inequalities, the expectation of fourth order has the following recursion

$$E(\|\delta_n\|^4) \leq (1 - 2m\eta_n + 2\eta_n^3)E(\|\delta_{n-1}\|^4) + 4(C_0^4 + \tau_n^4)\eta_n^3 \left( \eta_n + \frac{3m+9}{4m} \right).$$

Denote

$$C_{3,0} = (C_0^4 + \tau_n^4)(3 + 9/m), \quad C_{4,0} = 4(C_0^4 + \tau_n^4).$$

We then have

$$\begin{aligned} E(\|\delta_n\|^4) &\leq (1 - 2m\eta_n + 2\eta_n^3)E(\|\delta_{n-1}\|^4) + C_{3,0}\eta_n^3 + C_{4,0}\eta_n^4 \\ &\leq \prod_{k=1}^n (1 - 2m\eta_k + 2\eta_k^3)E(\|\delta_0\|^4) + \sum_{k=1}^n \prod_{i=k+1}^n (1 - 2m\eta_i + 2\eta_i^3)(C_{3,0}\eta_k^3 + C_{4,0}\eta_k^4) \\ &:= B_{1,n}E(\|\delta_0\|^4) + B_{2,n}. \end{aligned}$$

It is easy to show that

$$B_{1,n} \leq \exp \left( -2m \sum_{k=1}^n \eta_k + 2 \sum_{k=1}^n \eta_k^3 \right).$$

For  $B_{2,n}$ , denote  $n_0 = \inf\{n \in \mathbb{N} : 2\eta_n^3 \geq m\eta_n\}$ , we obtain

$$\begin{aligned} B_{2,n} &\leq \sum_{k=n_0+1}^n \prod_{i=k+1}^n \exp(-m\eta_i)(C_{3,0}\eta_k^3 + C_{4,0}\eta_k^4) \\ &\quad + \prod_{k=n_0+1}^n \exp(-m\eta_k) \sum_{k=1}^{n_0} \prod_{i=k+1}^{n_0} \exp(2\eta_i^3)(C_{3,0}\eta_k^3 + C_{4,0}\eta_k^4) \\ &\leq \sum_{k=1}^n \prod_{i=k+1}^n \exp(-m\eta_i)(C_{3,0}\eta_k^3 + C_{4,0}\eta_k^4) \\ &\quad + \prod_{k=1}^n \exp(-m\eta_k) \prod_{k=1}^{n_0} \exp(m\eta_k) \prod_{i=1}^{n_0} \exp(2\eta_i^3) \sum_{k=1}^{n_0} (C_{3,0}\eta_k^3 + C_{4,0}\eta_k^4) \\ &\leq \sum_{k=1}^n \prod_{i=k+1}^n \exp(-m\eta_i)(C_{3,0}\eta_k^3 + C_{4,0}\eta_k^4) \\ &\quad + \prod_{k=1}^n \exp(-m\eta_k) \prod_{i=1}^{n_0} \exp(4\eta_i^3) \sum_{k=1}^{n_0} (C_{3,0}\eta_k^3 + C_{4,0}\eta_k^4) \\ &:= B_{3,n} + B_{4,n}. \end{aligned}$$

For  $B_{3,n}$ , we have

$$\begin{aligned} B_{3,n} &= \sum_{k=1}^{n/2} \prod_{i=k+1}^n \exp(-m\eta_i)(C_{3,0}\eta_k^3 + C_{4,0}\eta_k^4) + \sum_{k=n/2+1}^n \prod_{i=k+1}^n \exp(-m\eta_i)(C_{3,0}\eta_k^3 + C_{4,0}\eta_k^4) \\ &\leq \prod_{i=n/2+1}^n \exp(-m\eta_i) \sum_{k=1}^{n/2} (C_{3,0}\eta_k^3 + C_{4,0}\eta_k^4) + \sum_{k=n/2+1}^n \prod_{i=k+1}^n \exp(-m\eta_i)(C_{3,0}\eta_{n/2}^2 + C_{4,0}\eta_{n/2}^3)\eta_k \\ &\leq \prod_{i=n/2+1}^n \exp(-m\eta_i) \sum_{k=1}^{n/2} (C_{3,0}\eta_k^3 + C_{4,0}\eta_k^4) + (C_{3,0}\eta_{n/2}^2 + C_{4,0}\eta_{n/2}^3) \sum_{k=1}^n \exp \left( -m \sum_{i=k+1}^n \eta_i \right) \eta_k \\ &\leq \prod_{i=n/2+1}^n \exp(-m\eta_i) \sum_{k=1}^{n/2} (C_{3,0}\eta_k^3 + C_{4,0}\eta_k^4) + \frac{1}{m} (C_{3,0}\eta_{n/2}^2 + C_{4,0}\eta_{n/2}^3). \end{aligned}$$



When  $\eta_n = \eta n^{-\alpha}$  and using the bounds of summations, we obtain

$$\begin{aligned} B_{1,n} &\leq \exp\{-m\eta\psi_{1-\alpha}(n) + 2\eta^3\psi_{1-3\alpha}(n)\}, \\ B_{3,n} &\leq \exp\left[-\frac{m\eta}{2}\{\psi_{1-\alpha}(n) - \psi_{1-\alpha}(n/2)\}\right]\{C_{3,0}\eta^3\psi_{1-3\alpha}(n) + C_{4,0}\eta^4\psi_{1-4\alpha}(n)\} \\ &\quad + \frac{1}{m}\left(C_{3,0}\frac{\eta^2 2^{2\alpha}}{n^{2\alpha}} + C_{4,0}\frac{\eta^3 2^{3\alpha}}{n^{3\alpha}}\right), \\ B_{4,n} &\leq \exp\left\{-\frac{m\eta}{2}\psi_{1-\alpha}(n) + 4\eta^3\psi_{1-3\alpha}(n)\right\}(C_{3,0}\eta^3\psi_{1-3\alpha}(n) + C_{4,0}\eta^4\psi_{1-4\alpha}(n)). \end{aligned}$$

Combining the above inequalities, we have

$$\begin{aligned} E(\|\delta_n\|^4) &\leq \exp\{-m\eta\psi_{1-\alpha}(n) + 2\eta^3\psi_{1-3\alpha}(n)\}E(\|\delta_0\|^4) + \frac{1}{m}\left(C_{3,0}\frac{\eta^2 2^{2\alpha}}{n^{2\alpha}} + C_{4,0}\frac{\eta^3 2^{3\alpha}}{n^{3\alpha}}\right) \\ &\quad + \exp\left\{-\frac{m\eta}{4}n^{1-\alpha} + 4\eta^3\psi_{1-3\alpha}(n)\right\}\{C_{3,0}\eta^3\psi_{1-3\alpha}(n) + C_{4,0}\eta^4\psi_{1-4\alpha}(n)\}. \end{aligned}$$

Therefore, using (3), we get

$$\begin{aligned} E(\|\bar{\theta}_n - \theta^*\|^2) &\leq \frac{1}{n} \text{tr} [E\{\nabla^2 f(\theta^*, x_k)\}^{-1} S E\{\nabla^2 f(\theta^*, x_k)\}^{-1}] \\ &\quad + \frac{1}{mn^2} \sum_{k=1}^{n-1} E(\|\theta_k - \theta^*\|^2)(\eta_{k+1}^{-1} - \eta_k^{-1})^2 + \frac{1}{mn^2\eta_n^2} E(\|\theta_n - \theta^*\|^2) \\ &\quad + \left(\frac{1}{mn^2\eta_1^2} + \frac{4M^2}{mn^2}\right) E(\|\theta_0 - \theta^*\|^2) + \frac{1}{mn^2} \sum_{k=1}^n E(\|A_k\|^2) \\ &\quad + \frac{C_1}{4n^2m} \sum_{k=1}^{n-1} E(\|\theta_k - \theta^*\|^4) + \frac{C_1}{4n^2m} E(\|\theta_0 - \theta^*\|^4) + \frac{4M^2}{mn^2} \sum_{k=1}^{n-1} E\|\theta_k - \theta^*\|^2 \\ &:= J_1 + J_2 + J_3 + J_4 + J_5 + J_6 + J_7 + J_8. \end{aligned}$$

Now, we calculate the bound for each term  $J_j$ ,  $j = 1, \dots, 8$ . Let

$$B = \sum_{k=1}^n \exp\left\{-\frac{m\eta^{1-\alpha}}{k}/4 + \psi_{1-2\alpha}(k) + 4\eta^3\psi_{1-3\alpha}(k)\right\}.$$

We then have

$$\begin{aligned} J_2 &\leq \frac{4\alpha^2}{mn^2\eta^2} \sum_{k=1}^{n-1} k^{2(\alpha-1)} E(\|\theta_k - \theta^*\|^2) \\ &\leq \frac{4\alpha^2}{mn^2\eta^2} \sum_{k=1}^{n-1} \frac{\eta\tilde{\sigma}_\mu^2}{m} k^{\alpha-2} + \frac{4\alpha^2}{mn^2\eta^2} \sum_{k=1}^{n-1} \exp\{\psi_{1-2\alpha}(k) - m\eta k^{1-\alpha}/2\} (E\|\delta_0\|^2 + \eta^2\tilde{\sigma}_\mu^2) k^{2(\alpha-1)} \\ &\leq \frac{4\alpha^2\tilde{\sigma}_\mu^2}{m^2n^2\eta^2} \psi_{\alpha-1}(n) + \frac{4\alpha^2}{mn^2\eta^2} (E\|\delta_0\|^2 + \eta^2\tilde{\sigma}_\mu^2) B, \\ J_3 &\leq \frac{1}{mn^{2(1-\alpha)}\eta^2} \left[ \exp\{-2m\eta\psi_{1-\alpha}(n)\} \Delta_0 + \frac{\eta\tilde{\sigma}_\mu^2}{mn^\alpha} + \eta^2\tilde{\sigma}_\mu^2\psi_{1-2\alpha}(n) \exp(-m\eta n^{1-\alpha}/2) \right] \\ &\leq \frac{\tilde{\sigma}_\mu^2}{m^2n^{2-\alpha}\eta} + \frac{1}{mn^{2(1-\alpha)}\eta^2} E\|\delta_0\|^2 + \frac{\tilde{\sigma}_\mu^2}{mn^{2(1-\alpha)}} \psi_{1-2\alpha}(n), \\ J_5 &\leq \frac{1}{mn^2} \sum_{k=1}^n \tau_k^2 \leq \frac{\tilde{\sigma}_\mu^2}{mn}, \end{aligned}$$

$$\begin{aligned}
J_6 &\leq \frac{C_1}{4n^2m^2} \sum_{k=1}^{n-1} \left( C_{3,0} \frac{\eta^2 2^{2\alpha}}{k^{2\alpha}} + C_{4,0} \frac{\eta^3 2^{3\alpha}}{k^{3\alpha}} \right) \\
&\quad + \frac{C_1}{4n^2m} \{E\|\delta_0\|^4 + C_{3,0}\eta^3\psi_{1-3\alpha}(n) + C_{4,0}\eta^4\psi_{1-4\alpha}(n)\} B \\
&\leq \frac{C_1 C_{3,0} \eta^2}{n^2 m^2} \psi_{1-2\alpha}(n) + \frac{2C_1 C_{4,0} \eta^3}{n^2 m^2} \psi_{1-3\alpha}(n) \\
&\quad + \frac{C_1}{4n^2m} \{E\|\delta_0\|^4 + C_{3,0}\eta^3\psi_{1-3\alpha}(n) + C_{4,0}\eta^4\psi_{1-4\alpha}(n)\} B, \\
J_8 &\leq \frac{4M^2}{mn^2} \sum_{k=1}^{n-1} \frac{\eta \tilde{\sigma}_\mu^2}{m} k^{-\alpha} + \frac{4M^2}{mn^2} (E\|\delta_0\|^2 + \eta^2 \tilde{\sigma}_\mu^2) B \\
&\leq \frac{4M^2 \eta \tilde{\sigma}_\mu^2}{m^2 n^2} \psi_{1-\alpha}(n) + \frac{4M^2}{mn^2} (E\|\delta_0\|^2 + \eta^2 \tilde{\sigma}_\mu^2) B.
\end{aligned}$$

Finally, we obtain the overall bound as

$$\begin{aligned}
E(\|\bar{\theta}_n - \theta^*\|^2) &\leq \frac{1}{n} \text{tr} [E\{\nabla^2 f(\theta^*, x_k)\}^{-1} S E\{\nabla^2 f(\theta^*, x_k)\}^{-1}] + \frac{4\alpha^2 \tilde{\sigma}_\mu^2}{m^2 n^2 \eta} \psi_{\alpha-1}(n) + \frac{\tilde{\sigma}_\mu^2}{m^2 n^{2-\alpha} \eta} \\
&\quad + \left( \frac{1}{mn^2 \eta_1^2} + \frac{1}{mn^{2(1-\alpha)} \eta^2} + \frac{4M^2}{mn^2} \right) E\|\delta_0\|^2 + \frac{\tilde{\sigma}_\mu^2}{mn^{2(1-\alpha)}} \psi_{1-2\alpha}(n) \\
&\quad + \frac{C_1 C_{3,0} \eta^2}{n^2 m^2} \psi_{1-2\alpha}(n) + \frac{2C_1 C_{4,0} \eta^3}{n^2 m^2} \psi_{1-3\alpha}(n) + \frac{4M^2 \eta \tilde{\sigma}_\mu^2}{m^2 n^2} \psi_{1-\alpha}(n) + \frac{\tilde{\sigma}_\mu^2}{mn} \\
&\quad + \left( \frac{4\alpha^2}{mn^2 \eta^2} + \frac{4M^2}{mn^2} \right) (E\|\delta_0\|^2 + \eta^2 \tilde{\sigma}_\mu^2) B + \frac{C_1}{4mn^2} E\|\delta_0\|^4 \\
&\quad + \frac{4M^2 \eta \tilde{\sigma}_\mu^2}{m^2 n^2} \{E\|\delta_0\|^4 + C_{3,0}\eta^3\psi_{1-3\alpha}(n) + C_{4,0}\eta^4\psi_{1-4\alpha}(n)\} B.
\end{aligned}$$

The proof of this theorem is completed.  $\square$

*Proof of Theorem 5.* Using the same arguments in Theorem 3, we have the following recursion

$$\Delta_n \leq \Delta_{n-1} + C_0^2 \eta_n^2 + \tau_n^2 \eta_n^2.$$

After applying the previous recursion  $n$  times, we have

$$\Delta_n \leq \Delta_0 + \tilde{\sigma}_\mu^2 \sum_{k=1}^n \eta_k^2 \equiv K_n,$$

where  $\tilde{\sigma}_\mu^2 = \max_k \{C_0^2 + \tau_k^2\}$ . Using the Lipschitz continuity of  $F(\theta)$  and taking conditional expectations, we have

$$\begin{aligned}
F(\theta_n) &\leq F(\theta_{n-1}) - \eta_n \langle \nabla F(\theta_{n-1}), \nabla F(\theta_{n-1}, x_n) + A_n \rangle + \frac{\eta_n^2 M}{2} \|\nabla F(\theta_{n-1}, x_n) + A_n\|^2, \\
E\{F(\theta_n) \mid \mathcal{F}_{n-1}\} &\leq F(\theta_{n-1}) - \eta_n \|\nabla F(\theta_{n-1})\|^2 + \frac{\eta_n^2 M}{2} E\{\|\nabla F(\theta_{n-1}, x_n)\|^2\} + \frac{\eta_n^2 \tau_n^2 M}{2},
\end{aligned}$$

where  $(\mathcal{F}_n)_{n \geq 0}$  are an increasing family of  $\sigma$ -fields and  $\theta_0$  is  $\mathcal{F}_0$ -measurable. Using  $F(\theta) - F(\theta^*) \leq \langle \nabla F(\theta), \theta - \theta^* \rangle$ , denote  $D_n = E\{F(\theta_n) - F(\theta^*)\}$ , we have

$$D_{n-1}^2 = [E\{F(\theta_{n-1}) - F(\theta^*)\}]^2 \leq E\{\|\nabla F(\theta_{n-1})\|^2\} E(\|\theta_{n-1} - \theta^*\|^2).$$

In addition, note that  $E(\|\nabla f(\theta_{n-1}, x_n)\|^2) \leq C_0^2$ , we have

$$D_n \leq D_{n-1} - \frac{\eta_n}{K_n} D_{n-1}^2 + \frac{\eta_n^2 M \tilde{\sigma}_\mu^2}{2}.$$

For  $\alpha > 1/2$ ,  $\sum_{k=1}^{\infty} \eta_k^2$  is bounded and we define  $\lim_{n \rightarrow \infty} K_n = K_{\infty}$ . Consider another recursion by replacing inequality with equality:

$$\tilde{D}_n = \tilde{D}_{n-1} - \frac{\eta_n}{K_{\infty}} \tilde{D}_{n-1}^2 + \frac{\eta_n^2 M \tilde{\sigma}_{\mu}^2}{2},$$

with  $D_0 = \tilde{D}_0$ . Next, we show that for any  $n \in \mathbb{N}$ ,  $D_n \leq \tilde{D}_n$ . Define the function

$$t \mapsto g(t) := t - \frac{\eta_n}{K_{\infty}} t^2,$$

which is increasing on  $[0, K_{\infty}/(2\eta_n)]$ . Note that both  $D_n$  and  $\tilde{D}_n$  is bounded by  $(M/2)K_{\infty}$ . When  $\eta < 1/M$ , we have  $[0, MK_{\infty}/2] \subset [0, K_{\infty}/2\eta_n]$ . Then  $D_0 = \tilde{D}_0$  implies  $D_1 \leq \tilde{D}_1$ . Due to both sequences being within the increasing interval of  $g(t)$ , we have for any  $n \in \mathbb{N}$ ,  $D_n \leq \tilde{D}_n$ .

Define  $\varepsilon_n = (4M^{1/2}\tilde{\sigma}_{\mu}\eta^{3/2})^{-1}K_{\infty}^{1/2} \min\{1, n^{3\alpha/2-1}\}$ , note that  $\eta_n^{1/2} - \eta_{n+1}^{1/2} \geq \eta^{1/2}/(4n^{\alpha/2})$ , we then have for all  $n > 0$ ,

$$\begin{aligned} \eta_n^{1/2}(1 + \varepsilon_n)^{1/2} - \eta_{n+1}^{1/2}(1 + \varepsilon_{n+1})^{1/2} &\geq \eta_n^{1/2}(1 + \varepsilon_{n+1})^{1/2} - \eta_{n+1}^{1/2}(1 + \varepsilon_{n+1})^{1/2} \\ &\geq \frac{\eta^{1/2}}{4n^{\alpha/2}}(1 + \varepsilon_{n+1})^{1/2} \geq \frac{\eta^{1/2}}{4n^{\alpha/2}}, \\ \varepsilon_n M^{1/2} \tilde{\sigma}_{\mu} \eta_n^2 K_{\infty}^{-1/2} / \sqrt{2} &= \frac{\eta^{1/2} \min\{1, n^{3\alpha/2-1}\}}{4\sqrt{2}n^{2\alpha}} \leq \frac{\eta^{1/2}}{4\sqrt{2}n^{\alpha/2}} \\ &\leq \eta_n^{1/2}(1 + \varepsilon_n)^{1/2} - \eta_{n+1}^{1/2}(1 + \varepsilon_{n+1})^{1/2}. \end{aligned}$$

Let  $n_0$  be the smallest  $n$  such that  $\tilde{D}_{n-1}^2 \geq (1 + \varepsilon_n)M\eta_n\tilde{\sigma}_{\mu}^2K_{\infty}/2$ . Next, we show for all  $n \geq n_0$ , such that  $\tilde{D}_{n-1}^2 \geq (1 + \varepsilon_n)M\eta_n\tilde{\sigma}_{\mu}^2K_{\infty}/2$ . In fact, if  $\tilde{D}_{n-1} \geq (1 + \varepsilon_n)^{1/2}M^{1/2}\eta_n^{1/2}\tilde{\sigma}_{\mu}K_{\infty}^{1/2}/\sqrt{2}$ , due to the fact that  $g(t)$  is increasing in  $\tilde{D}_{n-1}$ , we have

$$\begin{aligned} \tilde{D}_n &\geq (1 + \varepsilon_n)^{1/2}M^{1/2}\eta_n^{1/2}\tilde{\sigma}_{\mu}K_{\infty}^{1/2}/\sqrt{2} - \frac{\eta_n}{2K_{\infty}}\{(1 + \varepsilon_n)^{1/2}M^{1/2}\eta_n^{1/2}\tilde{\sigma}_{\mu}K_{\infty}^{1/2}\}^2 + \frac{\eta_n^2 M \tilde{\sigma}_{\mu}^2}{2} \\ &\geq (1 + \varepsilon_{n+1})^{1/2}M^{1/2}\eta_{n+1}^{1/2}\tilde{\sigma}_{\mu}K_{\infty}^{1/2}/\sqrt{2} - \varepsilon_n \eta_n^2 M \tilde{\sigma}_{\mu}^2 / 2 \\ &\quad + M^{1/2}\tilde{\sigma}_{\mu}K_{\infty}^{1/2}\{\eta_n^{1/2}(1 + \varepsilon_n)^{1/2} - \eta_{n+1}^{1/2}(1 + \varepsilon_{n+1})^{1/2}\}/\sqrt{2} \\ &\geq (1 + \varepsilon_{n+1})^{1/2}M^{1/2}\eta_{n+1}^{1/2}\tilde{\sigma}_{\mu}K_{\infty}^{1/2}/\sqrt{2}. \end{aligned}$$

Correspondingly, the recursion for  $n > n_0$  can be updated by

$$\tilde{D}_n \leq \tilde{D}_{n-1} - \frac{\eta_n}{K_{\infty}} \tilde{D}_{n-1}^2 \frac{\varepsilon_n}{1 + \varepsilon_n}.$$

We then obtain

$$\frac{1}{\tilde{D}_{n-1}} \leq \frac{1}{\tilde{D}_n} - \frac{\eta_n}{K_{\infty}} \frac{\tilde{D}_{n-1}}{\tilde{D}_n} \frac{\varepsilon_n}{1 + \varepsilon_n} \leq \frac{1}{\tilde{D}_n} - \frac{\eta_n}{K_{\infty}} \frac{\varepsilon_n}{1 + \varepsilon_n}.$$

By summing  $n - n_0$  times, we get

$$\frac{1}{\tilde{D}_{n_0}} \leq \frac{1}{\tilde{D}_n} - \frac{1}{K_{\infty}} \sum_{k=n_0+1}^n \frac{\varepsilon_k}{1 + \varepsilon_k} \eta_k.$$

Therefore,

$$\begin{aligned} \tilde{D}_n &\leq \frac{1}{\frac{1}{K_{\infty}} \sum_{k=n_0+1}^n \frac{\varepsilon_k}{1 + \varepsilon_k} \eta_k + \frac{1}{\tilde{D}_{n_0}}} \\ &\leq \frac{1}{\frac{1}{K_{\infty}} \sum_{k=n_0+1}^n \frac{\varepsilon_k}{1 + \varepsilon_k} \eta_k + \sqrt{2}(1 + \varepsilon_{n_0})^{-1/2} M^{-1/2} \eta_{n_0}^{-1/2} \tilde{\sigma}_{\mu}^{-1} K_{\infty}^{-1/2}}. \end{aligned}$$

Moreover, it is easy to show that

$$\begin{aligned}
\eta_n^{-1/2} (1 + \varepsilon_n)^{-1/2} &= \sum_{k=1}^{n-1} \left\{ \eta_{k+1}^{-1/2} (1 + \varepsilon_{k+1})^{-1/2} - \eta_k^{-1/2} (1 + \varepsilon_k)^{-1/2} \right\} + \eta_1^{-1/2} (1 + \varepsilon_1)^{-1/2} \\
&= \sum_{k=1}^{n-1} \frac{\eta_k^{1/2} (1 + \varepsilon_k)^{1/2} - \eta_{k+1}^{1/2} (1 + \varepsilon_{k+1})^{1/2}}{\eta_k^{1/2} (1 + \varepsilon_k)^{1/2} \eta_{k+1}^{1/2} (1 + \varepsilon_{k+1})^{1/2}} + \eta_1^{-1/2} (1 + \varepsilon_1)^{-1/2} \\
&\geq \sum_{k=1}^{n-1} (1 + \varepsilon_{k+1})^{-1} \eta_k^{-1/2} \eta_{k+1}^{-1/2} \left( \eta_k^{1/2} - \eta_{k+1}^{1/2} \right) + \eta_1^{-1/2} (1 + \varepsilon_1)^{-1/2} \\
&\geq \frac{1}{2} \sum_{k=1}^n \eta_k \frac{\varepsilon_k}{1 + \varepsilon_k} M^{1/2} \tilde{\sigma}_\mu K_\infty^{-1/2}.
\end{aligned}$$

Finally, we obtain

$$D_n \leq \tilde{D}_n \leq \frac{1}{\frac{1}{2K_\infty} \sum_{k=1}^n \frac{\varepsilon_k}{1 + \varepsilon_k} \eta_k}.$$

When  $1/2 < \alpha \leq 2/3$ , we have

$$\begin{aligned}
D_n &\leq \frac{2K_\infty}{\sum_{k=1}^n \frac{\eta_k^{k-\alpha}}{1 + 4M^{1/2} \tilde{\sigma}_\mu \eta^{3/2} K_\infty^{-1/2} k^{1-3\alpha/2}}} \\
&= \frac{2K_\infty^{1/2} (1 + 4M^{1/2} \tilde{\sigma}_\mu \eta^{3/2}) / \eta}{\sum_{k=1}^n k^{\alpha/2-1}} \leq \frac{2K_\infty^{1/2} (1 + 4M^{1/2} \tilde{\sigma}_\mu \eta^{3/2}) / \eta}{\psi_{\alpha/2}(n)} \\
&\leq \frac{2\{\Delta_0 + \tilde{\sigma}_\mu^2 \eta^2 \psi_{1-2\alpha}(n)\}^{1/2} (1 + 4M^{1/2} \tilde{\sigma}_\mu \eta^{3/2}) / \eta}{\psi_{\alpha/2}(n)}.
\end{aligned}$$

When  $2/3 < \alpha < 1$ , we have

$$\begin{aligned}
D_n &\leq \frac{2K_\infty}{\sum_{k=1}^n \frac{\eta_k^{k-\alpha}}{1 + 4M^{1/2} \tilde{\sigma}_\mu \eta^{3/2} K_\infty^{-1/2}}} \\
&= \frac{2K_\infty^{1/2} (1 + 4M^{1/2} \tilde{\sigma}_\mu \eta^{3/2}) / \eta}{\sum_{k=1}^n k^{-\alpha}} \leq \frac{2K_\infty^{1/2} (1 + 4M^{1/2} \tilde{\sigma}_\mu \eta^{3/2}) / \eta}{\psi_{1-\alpha}(n)} \\
&\leq \frac{2\{\Delta_0 + \tilde{\sigma}_\mu^2 \eta^2 \psi_{1-2\alpha}(n)\}^{1/2} (1 + 4M^{1/2} \tilde{\sigma}_\mu \eta^{3/2}) / \eta}{\psi_{1-\alpha}(n)}.
\end{aligned}$$

For  $0 \leq \alpha \leq 1/2$ ,  $\sum_{k=1}^\infty \eta_k^2$  diverges, then we consider the following equality:

$$\tilde{D}_n = \tilde{D}_{n-1} - \frac{\eta_n}{K_n} \tilde{D}_{n-1}^2 + \frac{\eta_n^2 M \tilde{\sigma}_\mu^2}{2},$$

with  $K_n \leq \Delta_0 + \tilde{\sigma}_\mu^2 \eta^2 \psi_{1-2\alpha}(n)$ . We follow the same procedure above and get

$$\begin{aligned}
D_n &\leq \tilde{D}_n \leq \frac{1}{\frac{1}{2} \sum_{k=1}^n \frac{1}{K_k} \frac{\varepsilon_k}{1 + \varepsilon_k} \eta_k} \\
&\leq \frac{2(1 + 4M^{1/2} \tilde{\sigma}_\mu \eta^{3/2}) / \eta}{\sum_{k=1}^n K_k^{-1/2} k^{\alpha/2-1}} \\
&\leq \frac{2(\Delta_0 + \tilde{\sigma}_\mu^2 \eta^2) (1 + 4M^{1/2} \tilde{\sigma}_\mu \eta^{3/2}) / \eta}{(1 - 2\alpha)^{1/2} \sum_{k=1}^n k^{3(\alpha-1)/2}} \\
&\leq \frac{2(\Delta_0 + \tilde{\sigma}_\mu^2 \eta^2) (1 + 4M^{1/2} \tilde{\sigma}_\mu \eta^{3/2}) / \eta}{(1 - 2\alpha)^{1/2} \psi_{3\alpha/2-1/2}(n)}.
\end{aligned}$$

We have completed the proof of this theorem.  $\square$

*Proof of Theorem 6.* By convexity of  $F(\theta)$ , we have

$$F\left(\frac{1}{n} \sum_{k=1}^n \theta_k\right) \leq \frac{1}{n} \sum_{k=1}^n F(\theta_k).$$

The convexity also implies  $F(\theta_k) - F(\theta^*) \leq \langle \nabla F(\theta_k), \theta_k - \theta^* \rangle$ . From the previous inequality, we then have

$$E(\|\theta_k - \theta^*\|^2 \mid \mathcal{F}_{k-1}) \leq \|\theta_{k-1} - \theta^*\|^2 - 2\eta_n E\{\langle \theta_{k-1} - \theta^*, \nabla F(\theta_{k-1}) \rangle\} + \eta_n^2 (C_0^2 + \tau_k^2).$$

Therefore,

$$\begin{aligned} E\left\{F\left(n^{-1} \sum_{k=1}^n \theta_k\right) - F(\theta^*)\right\} &\leq E\left[\frac{1}{n} \sum_{k=1}^n \{F(\theta_k) - F(\theta^*)\}\right] \\ &\leq E\left\{\frac{1}{n} \sum_{k=1}^n \langle \nabla F(\theta_k), \theta_k - \theta^* \rangle\right\} \\ &\leq \frac{1}{2n} \sum_{k=1}^n \left(\frac{\Delta_k - \Delta_{k-1}}{\eta_k} + \tilde{\sigma}_\mu^2 \sum_{k=0}^n \eta_k\right) \\ &\leq \frac{\Delta_n}{2n\eta_n} + \frac{\tilde{\sigma}_\mu^2 \eta \psi_{1-\alpha}(n)}{2n} \\ &= \frac{n^{\alpha-1}}{2\eta} \{\Delta_0 + \tilde{\sigma}_\mu^2 \eta^2 \psi_{1-2\alpha}(n)\} + \frac{\tilde{\sigma}_\mu^2 \eta \psi_{1-\alpha}(n)}{2n}. \end{aligned}$$

Hence, the proof of this theorem is completed.  $\square$

## REFERENCES

Phillippe Rigollet and Jan-Christian Hütter. High dimensional statistics. *Lecture notes for course 18S997*, 813(814):46, 2015.

## B ADDITIONAL EXPERIMENTS RESULTS

In this section, we showcase the remaining numerical results for both linear and logistic regressions, maintaining consistent configurations with dimensions  $d = 10, 20$ . These findings align with the trends discussed in the main body of the paper.

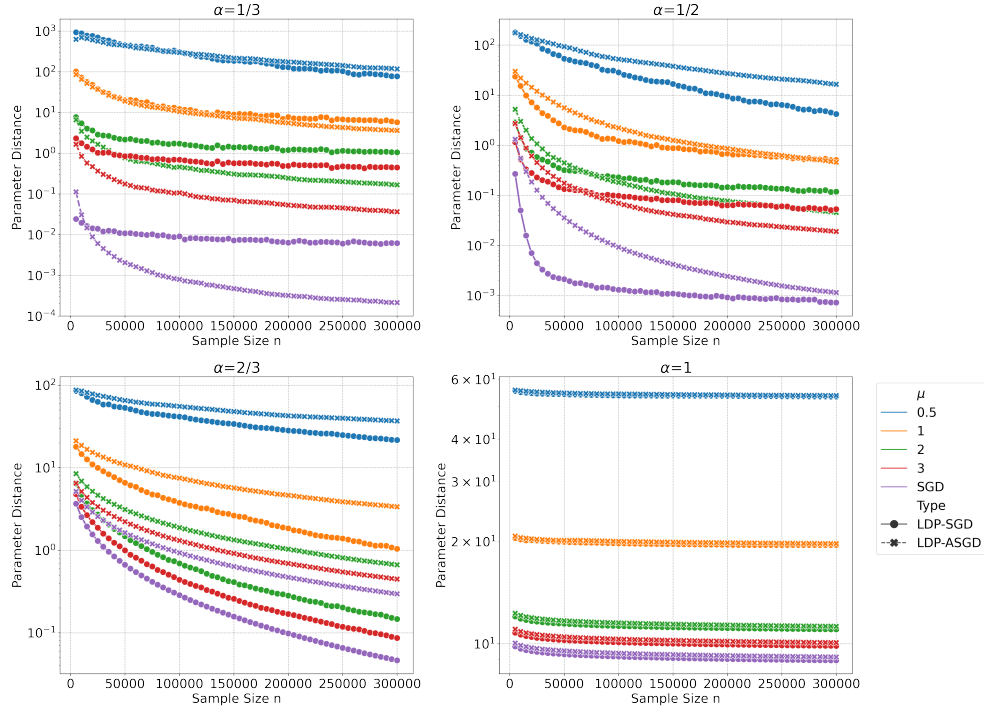

Figure 1: Trajectories of the distance between DP-SGD estimators and the optimal for linear regression with  $d = 10$ .

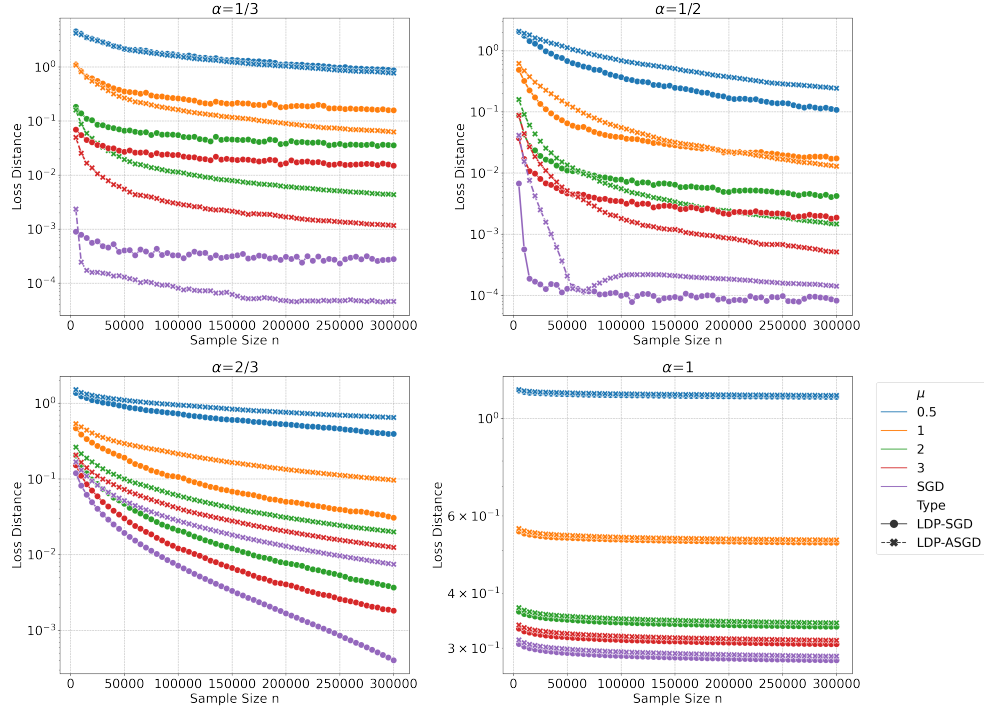

Figure 2: Trajectories of the distance between the loss incurred by the estimators and the optimal loss for linear regression with  $d = 10$ .

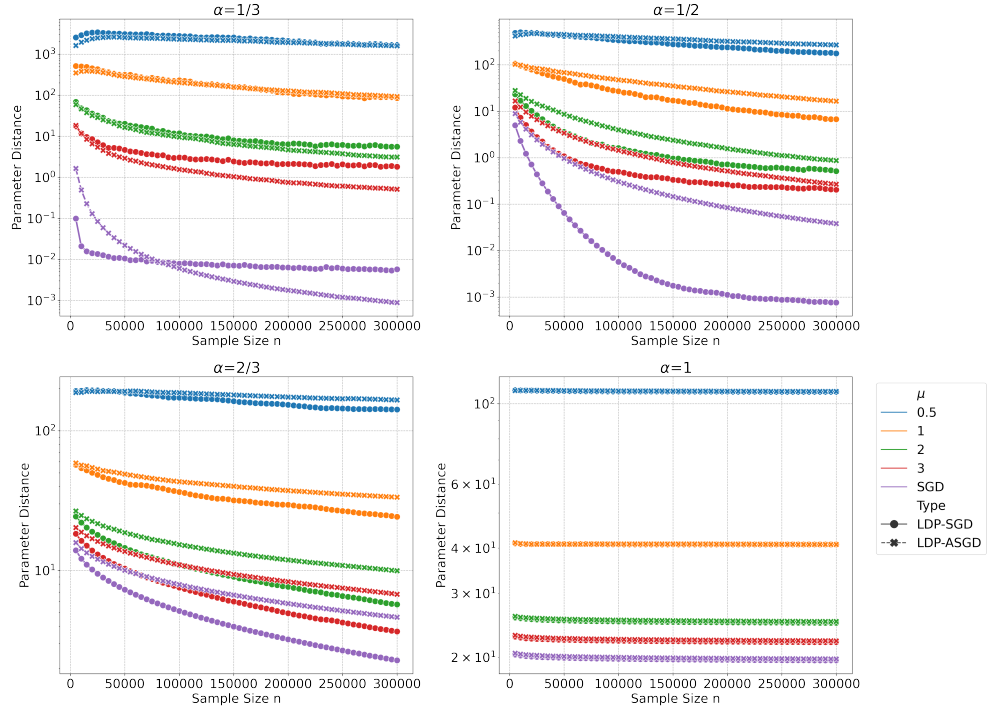

Figure 3: Trajectories of the distance between DP-SGD estimators and the optimal for linear regression with  $d = 20$ .

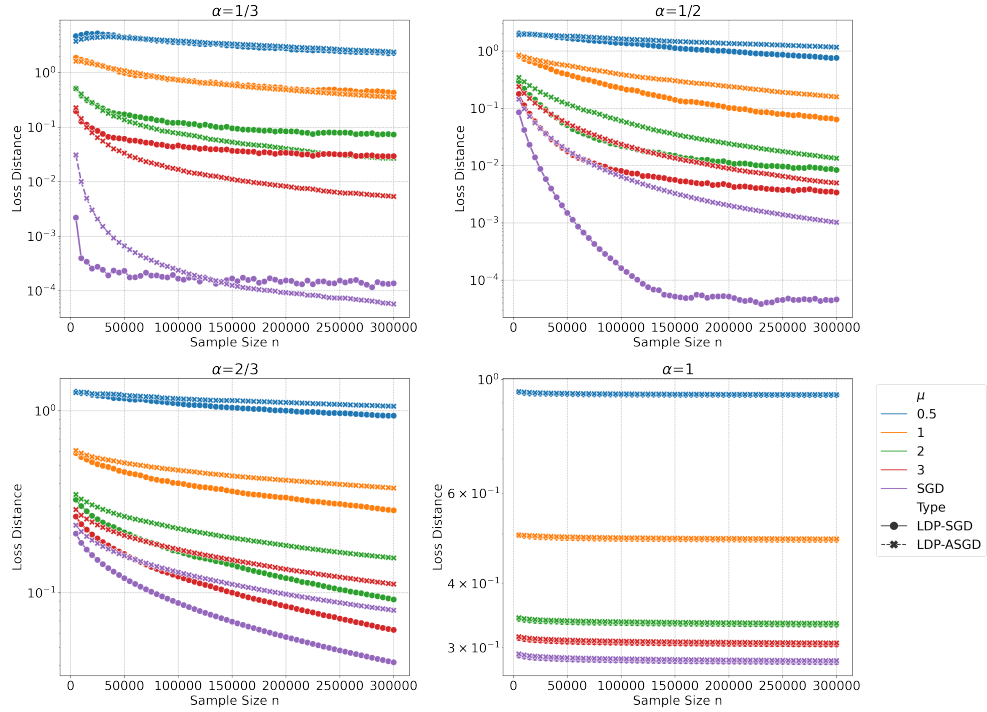

Figure 4: Trajectories of the distance between the loss incurred by the estimators and the optimal loss for linear regression with  $d = 20$ .

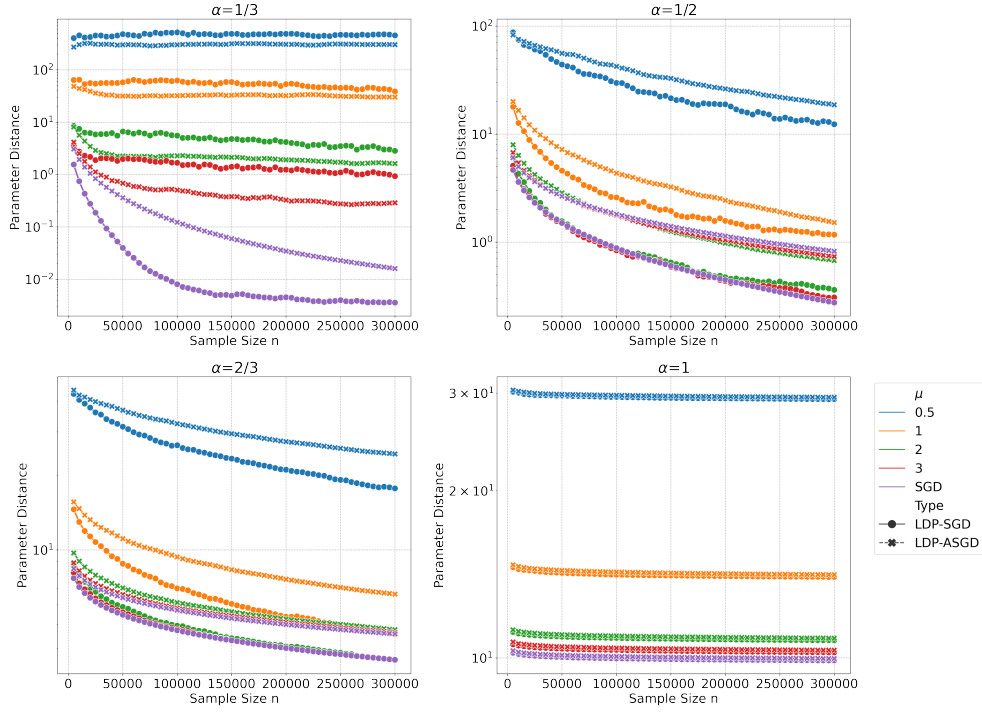

Figure 5: Trajectories of the distance between DP-SGD estimators and the optimal for logistic regression with  $d = 10$ .

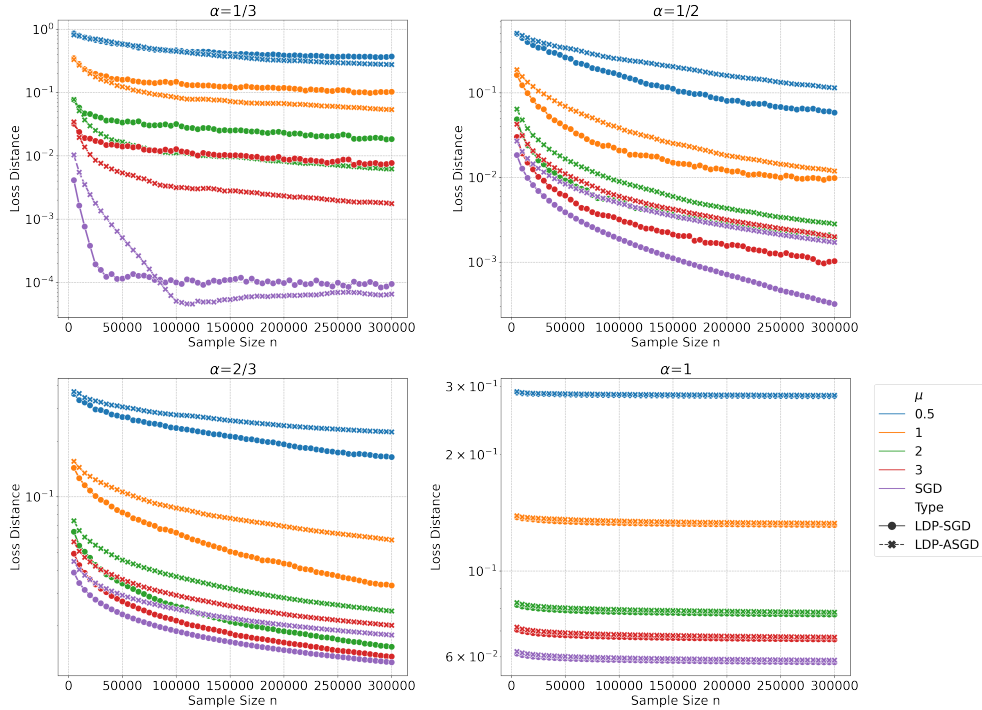

Figure 6: Trajectories of the distance between the loss incurred by the estimators and the optimal loss for logistic regression with  $d = 10$ .



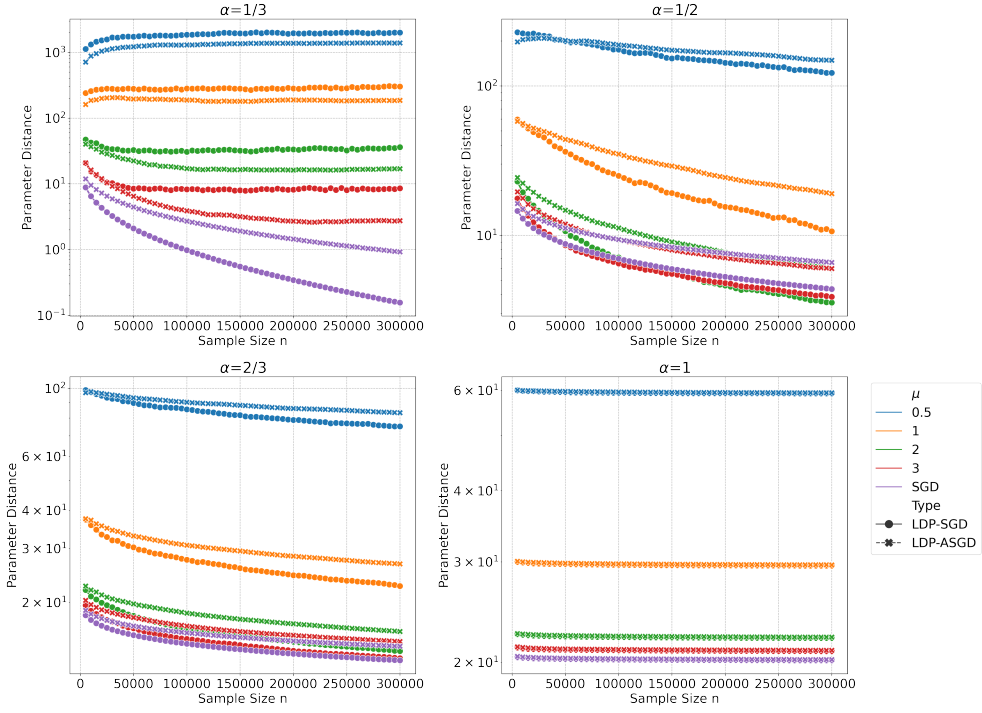

Figure 7: Trajectories of the distance between DP-SGD estimators and the optimal for logistic regression with  $d = 20$ .

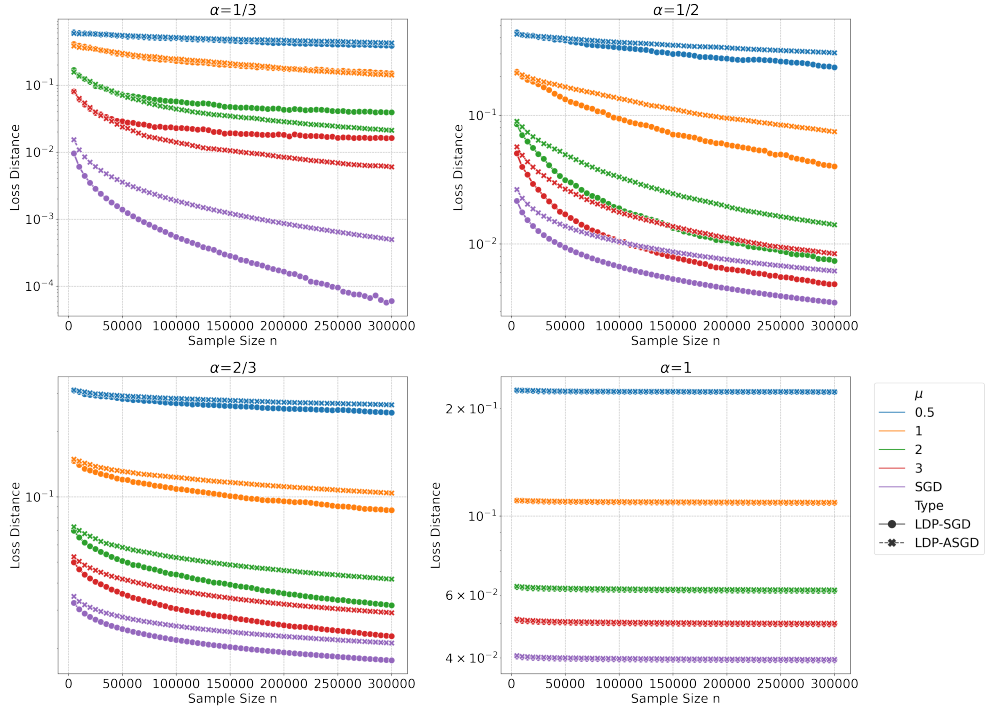

Figure 8: Trajectories of the distance between the loss incurred by the estimators and the optimal loss for logistic regression with  $d = 20$ .
